# Supplementary material for: Liver type 1 innate lymphoid cells lacking IL-7 receptor are a native killer cell subset fostered by parenchymal niches
Source: eLife. 2023 Jun 22;12:e84209. doi: 10.7554/eLife.84209 (PMC10289810; doi:10.7554/eLife.84209)
Supplement: Figure 1—source data 1. [file elife-84209-fig1-data1.xlsx]

## Sheet: Figure 1B
Legend	CD49b	CD49a	KLRG1	IL-7R	CD11b	CXCR6	Thy1	NKG2D	CD25	CD69	CD200R	CD62L	CXCR3	TRAIL	T-bet	Eomes
FL G1-ILC	479	7530	28.65	273.5	819	1020	2023	216	28.5	998	2075	159	2366	129	2454	1471
FL G1-ILC	515.5	7362.5	27	219.5	748	811	2449	209	20.2	862	2185	160	2349	108	2487	1551
FL G1-ILC	514	6882	27.3	256.5	726.5	826	2144	213	19	797	2157	127	1968	109	2610	1488
AL NK	2268	57.4	169	123	1470	139	2950	255	10.5	102	53.6	897	385	23.7	5542	4369
AL NK	2529	58.5	159	127	1246	152	2360	181	10.3	113	47.6	1150	365	21.6	4735	4032
AL NK	2299	69	225	135	1618	157	2750	170	12.9	110	54.8	1235	260	28.5	3413	3559
AL ILC1	117	6380	30.7	1185	406	1689	5062	217	32	663	1698	131	2044	398	5467	1434
AL ILC1	151	6384	28.6	826	410	1592	4483	205	33.4	650	1586	128	1822	368	5148	1346
AL ILC1	137	5493	27.4	1077	404	1511	6974	217	31.4	613	1574	125	1470	333	4169	1481
BM NK	4593	85.6	77	326	695	184	3538	233	14.5	138	103	921	1247	39	702.1	4866
BM NK	3880	82.3	43.7	285	712	187	2044	220	14	135	122	977	1083	41.3	727	4765
BM NK	3936	84.8	48.3	333	763	173	2677	209	16.1	138	101	1247	927	37.1	819	4837
BM ILC1	714	2928	44.2	11654	419	715	5592	223	77.4	293	541	298	1868	139	906.1	992
BM ILC1	530	2906	28.6	8041	712	966	3786	271	56	393	633	527	1620	118	889	918
BM ILC1	588	3030	25.8	7244	362	816	5856.33	306	95.2	359	575	624	1563	132	1083	1007
SP NK	2926	48.2	87.9	252	1008	107	1743	211	11.6	108	51.5	1077	387	24.2	5793	5161
SP NK	2669	39.9	92.7	209	907	105	1346	202	12.8	109	48.1	992	364	22.7	5399	5099
SP NK	2548	48.7	113	225	1133	112	1817	192	13.1	103	47.8	1404	292	22.8	5123	4972

## Sheet: Figure 1D
FL		AL		BM		LPL		PC		SP		mLN		SG
Percentage		Percentage		Percentage		Percentage		Percentage		Percentage		Percentage		Percentage
96.6		46		7.14		9.63		9.09		11.7		3.23		83.2
95.3		55.4		14.8		16		22.7		12.7		4.53		96.9
96.6		52.1		0		7.75		8.43		10.5		1.58		95.3
94.3		48.7		0		13.9		7.61		3.85		3.96		89.8
95.3		47.1		11.8		19.6		6.35		0		3.59		94.7
95.6		41.6		14.3		20		10		3.57		3.51		96.1
97.7		58.2
99		48.2
97.5
97.6
98.8
97.6
94.5
95.6
94.2

## Sheet: Figure 1I
AL					BM			SP
T	NK	7R+ ILC1	7R- ILC1		NK	ILC1		NK	ILC1
3.7	18.4	68.6	62.5		46.9	66.7		29	85.7
1.94	17.6	72	53.7		29	75		20.8	60
2.33	16.9	72.7	68.8		20.9	60		16.7	90
2.15	20.4	80.6	67.9					20.3	67.1
0.52	21.1	86.4	88.9					15	63.6
2.68	18.1	77	60.4					20.5	72.2

## Sheet: Figure 1J
Percentage
93.5
90.6
93.5
89.4
87.5

## Sheet: Figure 1-figure supplement 1B
Legend	T	NK	7R- ILC1	7R+ ILC1
WT	47.2182	3.58206	0.710591	0.746723
WT	41.0008	3.13879	0.60376	0.678403
WT	28.6588	4.40125	0.623301	0.876606
WT	33.0573	2.98274	0.691603	0.49625
WT	29.4984	3.56515	0.626012	0.672877
IL-7-/-	5.86072	4.88589	1.46397	1.58004
IL-7-/-	3.91935	5.59677	0.576037	0.87788
IL-7-/-	6.53582	6.13951	1.26385	1.22741
IL-7-/-	6.17138	5.96409	1.10371	1.14409
IL-7-/-	3.57169	7.71634	1.467	0.797586

## Sheet: Figure 1-figure supplement 1I
AL T	AL NK	AL 7R+ ILC1	AL 7R− ILC1	BM ILC1	Spleen ILC1
37.4	69	88	84.1	89.9	92.3
54	51	91	85.4	92.4	91
50.4	53.7	91.3	88.7	90.8	98.8
