# Supplementary material for: Liver type 1 innate lymphoid cells lacking IL-7 receptor are a native killer cell subset fostered by parenchymal niches
Source: eLife. 2023 Jun 22;12:e84209. doi: 10.7554/eLife.84209 (PMC10289810; doi:10.7554/eLife.84209)
Supplement: Figure 2—source data 1. [file elife-84209-fig2-data1.xlsx]

## Sheet: Figure 2B
E18.5
7R+ non-NK G1-ILC	7R- non-NK G1-ILC	NK
3.41	96.6	0
4.66	95.3	0
3.36	96.6	0
5.71	94.3	0
4.71	95.3	0
4.45	95.6	0
2w
7R+ non-NK G1-ILC	7R- non-NK G1-ILC	NK
12.8877	49.601	27.5294
10.8999	49.909	28.1429
12.1868	54.0485	23.0142
11.4513	73.8824	10.9275
12.3614	66.7556	16.9405
4w
7R+ non-NK G1-ILC	7R- non-NK G1-ILC	NK
12.6928	24.5196	60.083
11.5829	37.8293	48.7535
10.0558	34.1772	51.5213
9.3926	36.5048	50.1903
12.7339	20.1654	63.0491
9.38155	32.0703	55.1234
8w
7R+ non-NK G1-ILC	7R- non-NK G1-ILC	NK
18.0016	15.3407	63.508
12.815	15.8867	68.9945
14.6821	16.0149	66.856
12.1469	10.6089	77.1814
12.063	7.53824	80.335
16.7149	22.0521	61.2329
25.3258	31.3676	43.3066
11.0445	9.00831	79.9472
13.0119	14.7008	72.2873
24.3313	26.0338	49.6348
8.76141	14.1982	77.0404
13.9662	14.0379	71.9959
14.2036	15.1975	70.5989
11.0445	9.00831	79.9472
13.0119	14.7008	72.2873
16w
7R+ non-NK G1-ILC	7R- non-NK G1-ILC	NK
11.041	2.83889	84.7116
11.6103	2.11245	84.6523
15.1421	1.80333	80.8934
18.8926	3.55606	73.5569
20.534	4.55178	70.5572
14.2124	4.45632	78.3229
21.5202	2.90898	71.1188
10.7274	3.81132	81.8589
10.5611	5.68057	78.0078
9.08608	4.67588	80.1275

## Sheet: Figure 2C
E18.5
7R+ non-NK G1-ILC	7R- non-NK G1-ILC	NK
0.0910946	2.58206	0
0.0960346	1.96588	0
0.0617534	1.77541	0
0.091869	1.51584	0
0.101062	2.04272	0
0.0955351	2.05173	0
2w
7R+ non-NK G1-ILC	7R- non-NK G1-ILC	NK
1.20829	4.65035	2.58102
0.689886	3.15889	1.78125
0.948318	4.20581	1.79086
0.74763	4.82363	0.713433
0.717452	3.87448	0.98322
4w
7R+ non-NK G1-ILC	7R- non-NK G1-ILC	NK
0.614412	1.18691	2.90841
0.609035	1.98909	2.56349
1.05171	3.57449	5.38845
0.926831	3.60217	4.95261
1.46194	2.31514	7.23851
0.759915	2.59773	4.46505
8w
7R+ non-NK G1-ILC	7R- non-NK G1-ILC	NK
1.05858	1.07246	5.2217
1.71619	3.48565	3.41489
2.64203	4.00183	3.91739
3.23102	1.80933	6.97
2.21831	1.74953	6.13872
1.54854	3.65581	5.15761
3.41674	1.64081	6.09946
2.47796	1.77084	3.62492
2.77446	1.22234	3.6774
1.8961	2.74316
16w
7R+ non-NK G1-ILC	7R- non-NK G1-ILC	NK
1.76077	0.452733	13.5094
1.06618	0.193987	7.77367
0.960475	0.114386	5.13112
2.26847	0.426983	8.83211
2.01423	0.446496	6.92114
2.32954	0.73043	12.8378
1.41778	0.191647	4.6854
1.62443	0.57714	12.3957
1.80662	0.971741	13.3443
0.838098	0.431302	7.39095

## Sheet: Figure 2E
Genotype	7R+ ILC1	7R- ILC1	NK
WT	0.657368	1.2733	3.36694
WT	0.622032	1.14659	2.53775
WT	0.338836	0.441241	1.80844
WT	0.382106	0.755214	1.97995
WT	0.691664	0.710082	2.67519
WT	0.967549	0.466986	2.61336
RORa-/-	0.380366	1.56976	1.46713
RORa-/-	0.353154	1.2466	2.52037
RORa-/-	0.203488	0.925576	2.45018
RORa-/-	0.247188	1.08392	2.39273
RORa-/-	0.450266	0.909378	4.42895
RORa-/-	0.360211	0.605639	3.33755

## Sheet: Figure 2F
Genotype	7R+ ILC1	7R- ILC1	NK
WT	0.17872	1.44077	0.768946
WT	0.24351	2.07152	0.905214
WT	0.244843	2.64342	0.667501
WT	0.212728	1.48655	0.708244
WT	0.243694	2.0881	0.9463
WT	0.277273	2.62519	0.623227
RORa-/-	0.0158402	0.925566	0.612178
RORa-/-	0.0137381	0.941919	0.448492
RORa-/-	0.0231353	1.76174	0.507913
RORa-/-	0.0163525	0.973151	0.658973
RORa-/-	0.0188908	0.935522	0.460248
RORa-/-	0.0189918	1.73226	0.513779

## Sheet: Figure 2H
4w			8w
7R- ILC1	7R+ ILC1		7R- ILC1	7R+ ILC1
100	0		88.9292	11.0708
95.2381	4.7619		83.3	16.7
93.3333	6.66667		92.31	7.69
86.7209	13.2791
91.2125	8.78754
90	10

## Sheet: Figure 2I
4w			8w
7R- ILC1	7R+ ILC1		7R- ILC1	7R+ ILC1
23.913	76.087		5.82524	94.1748
9.1941	90.8059		10.8	89.2
8.27068	91.7293		6.9	93.1
7.33945	92.6606

## Sheet: Figure 2J
7R+ ILC1							7R- ILC1							NK
0	1	2	3	4	5 and more		0	1	2	3	4	5 and more		0	1	2	3	4	5 and more
29	35.5	22.6	6.45	6.45	0		22.5	42.5	27.5	0	0	7.5		14.6	19.4	24.3	16.5	11.7	13.6
39.4	28.2	14.1	14.1	4.23	0		34.1	39	24.4	0	0	0		16.6	18.8	23.8	16	14.9	9.94
33.5	30.4	21.5	9.42	3.66	1.57		28.1	29.7	21.9	17.2	0	0		18.9	20.9	15.5	20.3	10.1	14.2
20.6	17.6	26.5	20.6	11.8	2.94		46.2	33.3	20.5	0	0	0		13.7	20.4	19	16.4	16.4	14.2
17	30.2	35.8	11.3	1.89	3.77		39.5	34.9	18.6	2.33	0	4.65		12.2	23.2	17.1	8.54	19.5	19.5
														8.91	13.9	23.8	16.8	20.8	15.8

## Sheet: Figure 2K
7R- ILC1			7R+ ILC1
7R- ILC1	7R+ ILC1		7R- ILC1	7R+ ILC1
92.68	7.32		9.68	90.32
95.31	4.69		7.04	92.96
87.2	12.8		11	89
93.02	6.98		8.82	91.2
96.9	3.12		9.43	90.6
90	10

## Sheet: Figure 2-figure supplement 1C
7R- ILC1	7R+ ILC1
0	100
9.5	90.5
0	100
6.7	93.3
5.9	94.1
14.3	85.7

## Sheet: Figure 2-figure supplement 1D
7R- ILC1	7R+ ILC1
0.54	2.85
0.54	2.6
0.49	2.56
0.65	2.59
2.18	7.72
1.49	2.97
1.18	3.79
1.15	4.97
0.3	2.93
2.03	7.07
0.34	4.87
3.3	8.83
