# Supplementary material for: Liver type 1 innate lymphoid cells lacking IL-7 receptor are a native killer cell subset fostered by parenchymal niches
Source: eLife. 2023 Jun 22;12:e84209. doi: 10.7554/eLife.84209 (PMC10289810; doi:10.7554/eLife.84209)
Supplement: Figure 3—source data 1. [file elife-84209-fig3-data1.xlsx]

## Sheet: Figure 3B
7R- ILC1	7R+ ILC1
96	4
100	0
100	0
100	0

## Sheet: Figure 3D
7R- ILC1	7R+ ILC1
92.7	7.3
95.8	4.2
95.8	4.2
97.2	2.8
92.7	7.3
96.9	3.1
96.9	3.1
99	1
95.9	4.1
95.6	4.4

## Sheet: Figure 3E
7R- ILC1	7R+ ILC1
97.9	2.1
97.2	2.8
98.4	1.6
97.1	2.9
96.2	3.8

## Sheet: Figure 3G
Neonatal			4w
Tomato+	Tomato-		Tomato+	Tomato-
25.7	74.3		18.1	81.9
24.8	75.2		20	80
59.3	40.7		12	88
26.6	73.4		10.6	89.4
68.7	31.3		46.4	53.6
31	69
23	77
11.9	88.1
59.3	40.7
79.8	20.2

## Sheet: Figure 3-figure supplement 1C
Ly49E+	Ly49E-
40.1	59.9
39	61
32.8	67.2
42	58
58.1	41.9

## Sheet: Figure 3-figure supplement 1D
Ly49E+	Ly49E-
81.9	18.1
72	28
72.7	27.3
74.9	25.1
85.3	14.7
