# Supplementary material for: Liver type 1 innate lymphoid cells lacking IL-7 receptor are a native killer cell subset fostered by parenchymal niches
Source: eLife. 2023 Jun 22;12:e84209. doi: 10.7554/eLife.84209 (PMC10289810; doi:10.7554/eLife.84209)
Supplement: Figure 4—source data 1. [file elife-84209-fig4-data1.xlsx]

## Sheet: Figure 4C
Legend
FL #1
FL #2
Legend
AL #1
AL #2
FL G1-ILC			NK		ILC1
Intravascular	Parenchyma		Intravascular	Parenchyma	Intravascular	Parenchyma
34	135		62	9	42	6
10	42		34	4	18	3
11	29		23	5	15	3
11	51		82	13	41	8

## Sheet: Figure 4E
7R+ ILC1	7R- ILC1	NK	NKT	T	ILC2	ILCP	Lin-CD122+	LSM
15.8	5.89	10	13	9.71	38.5312	17.6	36.2756	27.4
10.8	3.51	11.5	9.2	8.67	25	8.8	36.2715	26.1
12.7	5.57167	11.2	12.8	12.5	50.7	11.1	27.5202	30.3
11.1	5	12.2	9.06363	15.8	78.8	16	11.3	38.014
13.6	6.2	8.2	11.3	21.6216	27.8	17.6	10.3	33
					52.3	26.7	17.5	36.5
					25.2	26.1	10.2	28
						48.6		35.1
						20		22.7
