# Supplementary material for: Liver type 1 innate lymphoid cells lacking IL-7 receptor are a native killer cell subset fostered by parenchymal niches
Source: eLife. 2023 Jun 22;12:e84209. doi: 10.7554/eLife.84209 (PMC10289810; doi:10.7554/eLife.84209)
Supplement: Figure 5—source data 1. [file elife-84209-fig5-data1.xlsx]

## Sheet: Figure 5C
Genotype	Cell number
IL-15-f/f	1.13409
IL-15-f/f	0.932702
IL-15-f/f	1.37135
IL-15-f/f	1.34311
IL-15-f/f	2.02067
IL-15-f/f	0.946894
IL-15-f/f	2.67316
IL-15-f/f	2.06192
IL-15-f/f	1.83716
IL-15-f/f	1.60771
IL-15-f/f	2.14378
IL-15-f/f	2.14726
Alb-Cre(+) IL-15-f/f	0.916761
Alb-Cre(+) IL-15-f/f	0.949143
Alb-Cre(+) IL-15-f/f	1.52783
Alb-Cre(+) IL-15-f/f	1.37445
Alb-Cre(+) IL-15-f/f	1.78458
Alb-Cre(+) IL-15-f/f	0.545733
Alb-Cre(+) IL-15-f/f	0.798512
Alb-Cre(+) IL-15-f/f	0.745478
Alb-Cre(+) IL-15-f/f	0.961785
Alb-Cre(+) IL-15-f/f	0.603026

## Sheet: Figure 5E
Genotype	NK	7R+ ILC1	7R- ILC1
IL-15-f/f	13.7667	2.27149	1.77559
IL-15-f/f	15.1285	1.66167	1.59797
IL-15-f/f	7.62619	1.21196	1.29566
IL-15-f/f	6.46089	0.998402	0.82334
IL-15-f/f	10.9214	1.63329	0.959771
IL-15-f/f	4.76872	1.13432	1.54876
IL-15-f/f	3.00115	1.62991	2.22308
IL-15-f/f	4.79065	2.23776	1.33428
IL-15-f/f	3.10837	2.55259	1.5077
IL-15-f/f	3.58088	1.74638	1.01682
Alb-Cre(+) IL-15-f/f	10.7572	1.59781	0.754759
Alb-Cre(+) IL-15-f/f	14.5496	2.25564	1.03013
Alb-Cre(+) IL-15-f/f	10.667	1.3787	0.757239
Alb-Cre(+) IL-15-f/f	3.88526	1.05727	0.576286
Alb-Cre(+) IL-15-f/f	7.90553	1.10561	0.284023
Alb-Cre(+) IL-15-f/f	3.72745	1.00032	0.557345
Alb-Cre(+) IL-15-f/f	5.41803	1.78279	1.06383
Alb-Cre(+) IL-15-f/f	2.83334	0.925423	0.407675
Alb-Cre(+) IL-15-f/f	6.58224	2.58874	0.851413
Alb-Cre(+) IL-15-f/f	4.67509	0.997252	0.326295

## Sheet: Figure 5F
Genotype	NK	7R+ ILC1	7R- ILC1
IL-15-f/f	14.2473	2.15432	0.837193
IL-15-f/f	7.99757	1.98526	1.67905
IL-15-f/f	13.1508	2.80418	2.40294
IL-15-f/f	6.51388	1.57774	1.12328
IL-15-f/f	7.0933	1.64933	1.2609
Lyve1-Cre(+) IL-15-f/f	6.69472	1.09421	0.885557
Lyve1-Cre(+) IL-15-f/f	6.8159	1.11018	0.484813
Lyve1-Cre(+) IL-15-f/f	4.16098	1.86524	0.523727
Lyve1-Cre(+) IL-15-f/f	1.79404	1.54248	0.655278
Lyve1-Cre(+) IL-15-f/f	2.39691	1.50414	0.544514

## Sheet: Figure 5G
Genotype	NK	7R+ ILC1	7R- ILC1
IL-15-f/f	7.62619	1.21196	1.29566
IL-15-f/f	7.37542	1.30114	1.11022
IL-15-f/f	16.2115	1.90186	1.09862
IL-15-f/f	10.8708	1.5413	0.934146
IL-15-f/f	11.0451	1.99574	0.858217
IL-15-f/f	7.38812	2.0613	0.694276
IL-15-f/f	9.74028	1.86841	1.13505
IL-15-f/f	8.5266	1.49134	1.04718
IL-15-f/f	10.6426	2.62701	0.910949
IL-15-f/f	10.8521	2.2967	1.04107
LysM-Cre(+) IL-15-f/f	4.63726	0.93551	0.939014
LysM-Cre(+) IL-15-f/f	3.18014	0.462349	0.621281
LysM-Cre(+) IL-15-f/f	3.07226	0.644139	0.787741
LysM-Cre(+) IL-15-f/f	6.47957	0.524386	0.990155
LysM-Cre(+) IL-15-f/f	8.69965	0.780138	1.14857
LysM-Cre(+) IL-15-f/f	4.08152	0.314591	0.766078
LysM-Cre(+) IL-15-f/f	5.29836	0.858206	1.08482
LysM-Cre(+) IL-15-f/f	7.28349	0.761542	1.13121
LysM-Cre(+) IL-15-f/f	5.30702	0.478755	0.729688
LysM-Cre(+) IL-15-f/f	4.04198	0.481569	0.644898

## Sheet: Figure 5H
Genotype	NK	7R+ ILC1	7R- ILC1
IL-15-f/f	91.5	92	90.8
IL-15-f/f	82.7	85.2	81.3
IL-15-f/f	91.7	90.1	89.3
IL-15-f/f	88.1	84.3	86.6
Lyve1-Cre(+) IL-15-f/f	66.7	75.8	70.7
Lyve1-Cre(+) IL-15-f/f	76.7	81.2	76.8
Lyve1-Cre(+) IL-15-f/f	82.6	79.8	86.7
Lyve1-Cre(+) IL-15-f/f	84.5	77	65.7
Lyve1-Cre(+) IL-15-f/f	80.9	76.5	77.4

## Sheet: Figure 5I
Genotype	NK	7R+ ILC1	7R- ILC1
IL-15-f/f	35	12.9	26.3
IL-15-f/f	31	13.6	21.7
IL-15-f/f	33.9	6.38	13.7
IL-15-f/f	37.9	4.71	10.7
IL-15-f/f	36.9	6.16	9.42
Lyve1-Cre(+) IL-15-f/f	43.4	8.87	20.2
Lyve1-Cre(+) IL-15-f/f	37.6	12.2	21.5
Lyve1-Cre(+) IL-15-f/f	56.3	7.34	18.6
Lyve1-Cre(+) IL-15-f/f	44.3	2.62	9.23
Lyve1-Cre(+) IL-15-f/f	49.6	6.54	12.4

## Sheet: Figure 5J
Genotype	NK	7R+ ILC1	7R- ILC1
IL-15-f/f	85.8	92.1	91
IL-15-f/f	95	94.5	87.6
IL-15-f/f	87.1	87.8	89.8
IL-15-f/f	90.4	92.6	94.8
Alb-Cre(+) IL-15-f/f	90	90.5	89.3
Alb-Cre(+) IL-15-f/f	91.1	91.7	81.6
Alb-Cre(+) IL-15-f/f	92.8	90.2	90.6
Alb-Cre(+) IL-15-f/f	93.3	92.8	90.1

## Sheet: Figure 5K
Genotype	NK	7R+ ILC1	7R- ILC1
IL-15-f/f	24.6	12.6	5.05
IL-15-f/f	23.7	13.3	5.3
IL-15-f/f	29.8	20	10.5
IL-15-f/f	31.8	21	6.48
Alb-Cre(+) IL-15-f/f	28.1	4.78	12.3
Alb-Cre(+) IL-15-f/f	25.7	4.33	13.6
Alb-Cre(+) IL-15-f/f	31.1	3.39	14.3
Alb-Cre(+) IL-15-f/f	28.7	6.01	11.3
Alb-Cre(+) IL-15-f/f	26.6	13.4	21
Alb-Cre(+) IL-15-f/f	44.8	16.4	25

## Sheet: Figure 5-figure supplement 1C
Genotype	T	NKT		Genotype	T	NKT
IL-15-f/f	62.3956	32.6134		IL-15-f/f	51.9681	3.90577
IL-15-f/f	65.7659	8.72676		IL-15-f/f	40.2883	14.4006
IL-15-f/f	51.9681	3.90577		IL-15-f/f	48.031	34.0018
IL-15-f/f	37.0585	3.43013		IL-15-f/f	40.4025	22.9236
IL-15-f/f	43.283	4.53722		IL-15-f/f	23.7	17.0133
IL-15-f/f	26.2832	11.0828		IL-15-f/f	28.2689	17.2075
IL-15-f/f	28.9364	8.82479
Alb-Cre(+) IL-15-f/f	60.884	24.239		LysM-Cre(+) IL-15-f/f	53.72	4.19403
Alb-Cre(+) IL-15-f/f	55.4798	23.8458		LysM-Cre(+) IL-15-f/f	22.9515	10.5414
Alb-Cre(+) IL-15-f/f	61.8603	5.7654		LysM-Cre(+) IL-15-f/f	32.2649	8.34136
Alb-Cre(+) IL-15-f/f	28.5462	3.36419		LysM-Cre(+) IL-15-f/f	28.3263	11.2236
Alb-Cre(+) IL-15-f/f	28.3219	4.16752		LysM-Cre(+) IL-15-f/f	41.138	18.9947
Alb-Cre(+) IL-15-f/f	25.3866	8.16849		LysM-Cre(+) IL-15-f/f	46.1107	11.1104
Alb-Cre(+) IL-15-f/f	26.7195	11.2824

## Sheet: Figure 5-figure supplement 1D
Genotype	Cell number
IL-15-f/f	0.40797
IL-15-f/f	0.461245
IL-15-f/f	0.557182
IL-15-f/f	0.394952
Alb-Cre(+) IL-15-f/f	0.355646
Alb-Cre(+) IL-15-f/f	0.317404
Alb-Cre(+) IL-15-f/f	0.273201
Alb-Cre(+) IL-15-f/f	0.340883
Alb-Cre(+) IL-15-f/f	0.378309
