# Supplementary material for: Liver type 1 innate lymphoid cells lacking IL-7 receptor are a native killer cell subset fostered by parenchymal niches
Source: eLife. 2023 Jun 22;12:e84209. doi: 10.7554/eLife.84209 (PMC10289810; doi:10.7554/eLife.84209)
Supplement: Figure 6—source data 1. [file elife-84209-fig6-data1.xlsx]

## Sheet: Figure 6B
PBS				IL-15/IL-15Ra
NK	7R- ILC1	7R+ ILC1		NK	7R- ILC1	7R+ ILC1
226	555	152		931	722	313
92	431	34		645	972	322
0	65	0		687	855	235
0	244	0		414	538	188
211	432	49		596	811	174
325	580	195		1015	1141	594
				1099	1115	569

## Sheet: Figure 6C
NK		7R- ILC1		7R+ ILC1
Killing rate		Killing rate		Killing rate
28.2371		44.0978		17.3167
27.1971		57.0983		19.3968
21.7369		52.1581		1.97608
22.2569		56.3182		35.2366
33.1773		55.7982		38.1443
8.27386		57.6183		29.0246
5.0489		32.5667
		34.2453
		39.7965
		34.1396

## Sheet: Figure 6D
NK
20	40	60	80	100	120	140	160	180	200	220	240	260	280	300	320
100	97.7778	91.1111	91.1111	88.8889	91.1111	88.8889	82.2222	75.5556	77.7778	86.6667	84.4444	80	71.1111	80	82.2222
100	103.39	105.085	98.3051	98.3051	101.695	106.78	105.085	105.085	106.78	108.475	105.085	101.695	103.39	108.475	115.254
100	97.2222	94.4444	86.1111	83.3333	94.4444	94.4444	91.6667	80.5556	77.7778	86.1111	88.8889	88.8889	83.3333	83.3333	86.1111
100	94.1176	90.5882	88.2353	87.0588	92.3529	95.8824	95.2941	91.1765	97.0588	105.294	108.823	101.765	93.5294	97.6471	108.823
100	94.9045	93.6306	90.4459	90.4459	91.0828	92.3567	91.7198	87.2612	85.3503	88.535	91.0828	92.9936	93.6306	100	106.369
100	99.3865	89.5705	88.3436	88.9571	89.5705	84.0491	80.3681	77.9141	77.9141	77.3006	80.9816	81.5951	79.1411	72.3926	70.5521
7R- ILC1
20	40	60	80	100	120	140	160	180	200	220	240	260	280	300	320
100	103.03	96.9697	96.9697	86.3636	81.8182	69.697	68.1818	65.1515	66.6667	71.2121	63.6364	57.5758	46.9697	45.4545	39.3939
100	106.061	107.576	103.03	96.9697	90.9091	84.8485	84.8485	83.3333	75.7576	68.1818	59.0909	54.5455	46.9697	54.5455	56.0606
100	89.2857	82.1429	64.2857	60.7143	64.2857	71.4286	71.4286	71.4286	67.8571	67.8571	57.1429	57.1429	50	53.5714	46.4286
100	90.411	78.0822	79.4521	75.3425	75.3425	73.9726	65.7534	64.3836	57.5342	57.5342	47.9452	50.6849	49.3151	61.6438	57.5342
100	94.0217	84.7826	76.087	73.3696	68.4783	64.1304	54.8913	50.5435	46.1957	40.7609	38.587	36.413	37.5	35.8696	34.2391
100	87.3016	75.6614	68.254	66.6667	60.3175	55.5556	50.7937	53.9683	52.381	49.2063	41.2698	37.037	35.9788	34.3915	30.1587
7R+ ILC1
20	40	60	80	100	120	140	160	180	200	220	240	260	280	300	320
100	97.3684	100	100	100	97.3684	94.7368	92.1053	94.7368	102.632	105.263	102.632	89.4737	84.2105	81.5789	84.2105
100	98.0676	94.686	89.8551	85.5072	85.9903	88.4058	89.372	90.8213	89.372	87.4396	82.1256	79.2271	80.6763	79.7101	80.6763
100	93.6893	87.8641	84.9515	81.5534	77.1845	76.699	74.7573	71.3592	68.932	72.8155	78.6408	80.5825	79.6117	81.5534	81.5534
100	98.7342	95.5696	93.6709	90.5063	87.3418	89.8734	89.2405	87.9747	82.9114	87.9747	89.8734	93.6709	91.7722	94.9367	94.3038

## Sheet: Figure 6E
NK
20	40	60	80	100	120	140	160	180	200	220	240	260	280	300	320
100	94.8052	89.6104	87.013	84.4156	80.5195	79.2208	80.5195	81.8182	80.5195	77.9221	77.9221	75.3247	72.7273	67.5325	62.3377
100	103.175	103.175	104.762	103.175	101.587	95.2381	85.7143	82.5397	82.5397	85.7143	82.5397	76.1905	71.4286	73.0159	76.1905
100	102.985	104.478	102.985	94.0299	85.0746	79.1045	82.0896	77.6119	74.6269	68.6567	67.1642	62.6866	61.194	59.7015	61.194
100	100	98.913	97.8261	102.174	102.174	98.913	95.6522	95.6522	101.087	106.522	109.783	113.043	114.13	117.391	115.217
100	100	97.5	93.3333	91.6667	90.8333	87.5	82.5	78.3333	76.6667	76.6667	78.3333	81.6667	85	87.5	91.6667
100	100	101.98	100.99	100	97.0297	96.0396	99.0099	103.96	105.941	106.931	108.911	111.881	113.861	114.851	114.851
100	100	102.353	98.8235	96.4706	109.412	114.118	118.824	120	117.647	118.824	117.647	120	118.824	120	120
7R- ILC1
20	40	60	80	100	120	140	160	180	200	220	240	260	280	300	320
100	94.9153	91.5254	91.5254	88.1356	84.7458	79.661	72.8814	64.4068	52.5424	45.7627	37.2881	35.5932	28.8136	27.1186	22.0339
100	97.9167	95.8333	110.417	114.583	118.75	112.5	102.083	85.4167	75	68.75	62.5	56.25	50	45.8333	43.75
100	96.25	91.25	85	80	75	72.5	65	62.5	58.75	56.25	42.5	30	18.75	16.25	15
100	100	101.266	101.266	103.797	100	92.4051	82.2785	73.4177	64.557	59.4937	49.3671	44.3038	35.443	35.443	36.7089
100	100	100	100	101.064	100	94.6809	88.2979	79.7872	73.4043	67.0213	64.8936	63.8298	56.383	47.8723	40.4255
100	100	106.349	100	106.349	107.937	107.937	100	85.7143	77.7778	76.1905	79.3651	74.6032	68.254	65.0794	65.0794
100	100	95.6522	97.8261	102.174	103.261	102.174	92.3913	83.6957	66.3043	54.3478	42.3913	42.3913	39.1304	36.9565	31.5217
100	100	94.2149	90.0826	89.2562	90.9091	90.0826	82.6446	71.9008	58.6777	47.1074	39.6694	33.0579	25.6198	18.1818	14.876
7R+ ILC1
20	40	60	80	100	120	140	160	180	200	220	240	260	280	300	320
100	100	98.8506	95.4023	96.5517	96.5517	95.4023	93.1034	94.2529	93.1034	89.6552	81.6092	79.3103	74.7126	74.7126	68.9655
100	98.7179	93.5897	88.4615	82.0513	75.641	70.5128	67.9487	73.0769	78.2051	79.4872	75.641	78.2051	74.359	76.9231	65.3846
100	100	100	100	97.561	93.9024	90.2439	92.6829	92.6829	86.5854	81.7073	80.4878	85.3659	79.2683	74.3902	64.6341
100	100	101.042	96.875	95.8333	94.7917	96.875	100	102.083	103.125	97.9167	91.6667	80.2083	73.9583	67.7083	67.7083
100	100	93.5185	96.2963	96.2963	108.333	115.741	125	119.444	112.963	102.778	95.3704	91.6667	93.5185	94.4444	93.5185
100	100	100	97.7941	95.5882	95.5882	97.0588	97.7941	94.1176	88.9706	86.0294	83.0882	77.9412	72.0588	69.1176	68.3824
100	100	100	101.923	107.692	109.615	121.154	117.308	119.231	111.538	113.462	115.385	115.385	121.154	126.923	130.769
100	100	102.532	98.7342	100	103.797	111.392	112.658	106.329	98.7342	93.6709	94.9367	92.4051	93.6709	92.4051	91.1392

## Sheet: Figure 6F
NK
Control	CMA	α-TRAIL	α-FasL
82.2222	94.2857	120	90.4762
115.254	111.765	70.2128	80.7692
86.1111	91.4286	86.3636	102.273
108.823	87.9227	71.5084	74.8344
106.369	70.1492	95.082	92.8994
70.5521	72.6804	87.9518
7R- ILC1
39.3939	84.3137	88.4615	71.4286
56.0606	105.769	88.8889	46.6667
46.4286	87.3016	68.6274	42.3077
57.5343	100.575	57.9618	58
34.2391	88.6525	67.5325	42.7586
30.1587	88.806	56.872
7R+ ILC1
84.2105	81.1321	81.6326	78.9474
80.6763	84.375	102.336	100
81.5534	69.4175	81.9277	74.1117
94.3038	88.0503	104.192	94.5545

## Sheet: Figure 6H
PBS				IL-15/IL-15Ra
7R+ ILC1	7R- ILC1	NK		7R+ ILC1	7R- ILC1	NK
1833	2405	944		3913	3561	3570
2364	2495	1233		4339	3057	3478
2831	2536	930		5242	4182	4267
2034	2150	1109.5		5409	3532	3747
2679	2768	1530.9		5047	3400	3572
				5088	3424	4156

## Sheet: Figure 6J
Control				Rapa
7R+ ILC1	7R- ILC1	NK		7R+ ILC1	7R- ILC1	NK
230	857	437		141	526	382
399	760	591		181	540	413
134	674	376		329	720	415
485	983	725		131	476	389
460	825	707		381	524	582

## Sheet: Figure 6-figure supplement 1A
PBS				IL-15/IL-15Ra
NK	7R- ILC1	7R+ ILC1		NK	7R- ILC1	7R+ ILC1
67.6	105	88.2		132	145	138
62.4	94	73.2		134	131	148
56.2	101	76.3		112	112	110
57.6	103	81.6		117	127	98.4
257	207	125		460	352	290
247	165	145		508	173	131

## Sheet: Figure 6-figure supplement 1B
PBS				IL-15/IL-15Ra
NK	7R- ILC1	7R+ ILC1		NK	7R- ILC1	7R+ ILC1
56.8	843	641		112	1402	998
54.4	815	573		106	1392	1081
52.2	741	583		95.6	1369	906
55	772	547		99.6	1389	935
185	825	528		355	1485	982
215	960	730		457	1695	1076

## Sheet: Figure 6-figure supplement 1E
GrzB	NK
	Con	IL-15	IL-12/IL-18	NKG2D	NKp46	NK1.1	2B4	Hepa1-6
	336	2691	455	303	275	331	212	352
	295	2031	367	236	292	265	225	335
	188	2677	295	292	231	381	289	293
	226	2311	176	186	214	229	181	274
GrzB	7R- ILC1
	Con	IL-15	IL-12/IL-18	NKG2D	NKp46	NK1.1	2B4	Hepa1-6
	502	1837	730	450	388	368	353	649
	469	1467	581	367	408	395	337	590
	535	1747	869	680	574	804	691	669
	484	1516	674	550	468	547	575	622
GrzB	7R+ ILC1
	Con	IL-15	IL-12/IL-18	NKG2D	NKp46	NK1.1	2B4	Hepa1-6
	114	852	343	88	72	55	48	183
	100	669	182	53	92	42	82	172
	229	897	448	273	231	288	203	236
	200	807	278	233	259	236	222	217
TRAIL	NK
	Con	IL-15	IL-12/IL-18	NKG2D	NKp46	NK1.1	2B4	Hepa1-6
	238	284	225	256	251	263	297	313
	265	249	213	255	277	265	268	291
	285	301	253	287	303	295	276	306
	291	295	256	305	291	328	322	300
TRAIL	7R- ILC1
	Con	IL-15	IL-12/IL-18	NKG2D	NKp46	NK1.1	2B4	Hepa1-6
	758	1388	1032	745	627	881	802	239
	698	1478	1002	794	720	910	719	225
	779	1340	1168	957	874	949	940	302
	774	1350	1189	847	788	970	907	279
TRAIL	7R+ ILC1
	Con	IL-15	IL-12/IL-18	NKG2D	NKp46	NK1.1	2B4	Hepa1-6
	498	1037	840	669	525	617	604	203
	581	1227	762	618	507	705	515	263
	669	1163	917	652	647	719	645	246
	653	1065	795	639	631	678	625	269
GrzC	NK
	Con	IL-15	IL-12/IL-18	NKG2D	NKp46	NK1.1	2B4	Hepa1-6
	199	245	193	212	239	241	237	204
	250	226	259	223	201	241	220	185
	159	268	143	227	234	226	188	145
	167	206	140	193	178	207	207	144
GrzC	7R- ILC1
	Con	IL-15	IL-12/IL-18	NKG2D	NKp46	NK1.1	2B4	Hepa1-6
	1081	1264	811	1083	1443	1092	1094	1171
	1029	1285	1226	1084	1336	1084	1177	1316
	877	1343	959	1233	1355	1087	1193	923
	1183	1461	949	979	1231	1174	1389	966
GrzC	7R+ ILC1
	Con	IL-15	IL-12/IL-18	NKG2D	NKp46	NK1.1	2B4	Hepa1-6
	539	676	529	572	606	608	585	617
	598	717	812	574	602	611	574	585
	579	643	470	667	657	682	556	573
	490	590	484	592	405	639	555	481

[truncated: 2 more sheets: Figure 6-figure supplement 1F, Figure 6-figure supplement 1G]
